# Supplementary material
Source: HighWire-hosted journal article supplement (https://cmajopen.ca/highwire/filestream/84078/field_highwire_adjunct_files/3/2020-0107-reviewer-comments.pdf)
Supplement: 2020-0107-reviewer-comments.pdf [file 2020-0107-reviewer-comments.pdf]

| <b>Article details: 2020-0107</b>          |                                                                                                                                                                                                                                                                                                                                                                                                                                                                                                                                                                                                                                                                                                                                                                                                                                                                                                                                                                                                                                                                                                                                                                                                                                                                                                                                                                                                                                                                                                                                                                                                                                                                                                                                                                                                                                                                                                                                                                                                                                                                                                                                                                                                                                                                                                                                                                                                                                                                                                                                                                                                                                                                                                                                                                                                                                                                                                                                                                                                                                                                                                                                                                                                                                                                                                                                                                                                                                                                                                                                                                                                                                                                                         |
|--------------------------------------------|-----------------------------------------------------------------------------------------------------------------------------------------------------------------------------------------------------------------------------------------------------------------------------------------------------------------------------------------------------------------------------------------------------------------------------------------------------------------------------------------------------------------------------------------------------------------------------------------------------------------------------------------------------------------------------------------------------------------------------------------------------------------------------------------------------------------------------------------------------------------------------------------------------------------------------------------------------------------------------------------------------------------------------------------------------------------------------------------------------------------------------------------------------------------------------------------------------------------------------------------------------------------------------------------------------------------------------------------------------------------------------------------------------------------------------------------------------------------------------------------------------------------------------------------------------------------------------------------------------------------------------------------------------------------------------------------------------------------------------------------------------------------------------------------------------------------------------------------------------------------------------------------------------------------------------------------------------------------------------------------------------------------------------------------------------------------------------------------------------------------------------------------------------------------------------------------------------------------------------------------------------------------------------------------------------------------------------------------------------------------------------------------------------------------------------------------------------------------------------------------------------------------------------------------------------------------------------------------------------------------------------------------------------------------------------------------------------------------------------------------------------------------------------------------------------------------------------------------------------------------------------------------------------------------------------------------------------------------------------------------------------------------------------------------------------------------------------------------------------------------------------------------------------------------------------------------------------------------------------------------------------------------------------------------------------------------------------------------------------------------------------------------------------------------------------------------------------------------------------------------------------------------------------------------------------------------------------------------------------------------------------------------------------------------------------------------|
| Title                                      | Cost-effectiveness of antithrombotic agents for atrial fibrillation in older adults at risk of falls                                                                                                                                                                                                                                                                                                                                                                                                                                                                                                                                                                                                                                                                                                                                                                                                                                                                                                                                                                                                                                                                                                                                                                                                                                                                                                                                                                                                                                                                                                                                                                                                                                                                                                                                                                                                                                                                                                                                                                                                                                                                                                                                                                                                                                                                                                                                                                                                                                                                                                                                                                                                                                                                                                                                                                                                                                                                                                                                                                                                                                                                                                                                                                                                                                                                                                                                                                                                                                                                                                                                                                                    |
| Authors                                    | Eric K.C. Wong MD, Christina Kosar BScN MN, David M.J. Naimark MD MSc, Sharon E. Straus MD MSc, PhD                                                                                                                                                                                                                                                                                                                                                                                                                                                                                                                                                                                                                                                                                                                                                                                                                                                                                                                                                                                                                                                                                                                                                                                                                                                                                                                                                                                                                                                                                                                                                                                                                                                                                                                                                                                                                                                                                                                                                                                                                                                                                                                                                                                                                                                                                                                                                                                                                                                                                                                                                                                                                                                                                                                                                                                                                                                                                                                                                                                                                                                                                                                                                                                                                                                                                                                                                                                                                                                                                                                                                                                     |
| <b>Reviewer 1</b>                          | Derek Chew                                                                                                                                                                                                                                                                                                                                                                                                                                                                                                                                                                                                                                                                                                                                                                                                                                                                                                                                                                                                                                                                                                                                                                                                                                                                                                                                                                                                                                                                                                                                                                                                                                                                                                                                                                                                                                                                                                                                                                                                                                                                                                                                                                                                                                                                                                                                                                                                                                                                                                                                                                                                                                                                                                                                                                                                                                                                                                                                                                                                                                                                                                                                                                                                                                                                                                                                                                                                                                                                                                                                                                                                                                                                              |
| Institution                                | Department of Cardiac Sciences, University of Calgary, Calgary, Alta.                                                                                                                                                                                                                                                                                                                                                                                                                                                                                                                                                                                                                                                                                                                                                                                                                                                                                                                                                                                                                                                                                                                                                                                                                                                                                                                                                                                                                                                                                                                                                                                                                                                                                                                                                                                                                                                                                                                                                                                                                                                                                                                                                                                                                                                                                                                                                                                                                                                                                                                                                                                                                                                                                                                                                                                                                                                                                                                                                                                                                                                                                                                                                                                                                                                                                                                                                                                                                                                                                                                                                                                                                   |
| General comments (author response in bold) | <p>Wong et al. present the findings of a cost-utility analysis exploring the value proposition of several strategies (warfarin, and ASA) in older patients with non-valvular atrial fibrillation at high risk of falls. The authors address patients with atrial fibrillation (i.e. the elderly) where there is an underutilization of appropriate OAC possibly leading to falls and potential bleeding risk. The authors found that anticoagulation with apixaban was the most economical strategy in terms of QALY gained compared to ASA.</p> <p>Main concerns:</p> <p>ASA as an anticoagulation strategy is problematic since as per the clinical guidelines referenced in the manuscript, ASA is not considered an anticoagulation. Rather, it is only used in the setting of AF patients at low stroke risk with comorbidities such as kidney disease. In essence, the use of ASA is a “no anticoagulation” strategy with a bias towards increased bleeding risk. The authors eliminate ASA as a strategy and only include DOACs / warfarin.</p> <p><b>Although ASA is similar to “no anticoagulation,” efficacy estimates from the literature point to stroke risk being lower bleeding risk compared with anticoagulants. In a geriatric population where bleeding risk is high, the value of ASA as a treatment. Our results do not contradict the treatment guidelines. On the contrary, we favor over aspirin from an economic standpoint, which is not possible without including ASA. Also, another strategy for bleeding risk options. On balance, we decided to keep ASA in the model.</b></p> <p>To help visualize the different model inputs that result in variability of the estimated ICER, the authors should have done a deterministic sensitivity analysis. Specifically, is the model sensitive to falls as a clinical event? Under what circumstances would the value proposition of the different DOACs change?</p> <p><b>We added deterministic sensitivity analyses for falls, age, and bleeding risk, as suggested. This is included in the supplementary appendix 146.</b></p> <p><b>“Deterministic sensitivity analyses were done on the effect of mean starting age, baseline probability of first fall on average cost-effectiveness of each drug (Supplementary Figure SF4). Apixaban has the highest value across the full range of falls risk and mean starting age. When baseline probability of clinically important falls is beyond 0.25 per year (model estimate 0.09), the model favoured ASA over apixaban.”</b></p> <p>The authors stated that variables that did not have variability (fixed costs) were inputted without distribution. For generalizability of study findings, the authors should consider modelling in the uncertainty / variability of drug pricing (e.g. drug costs +/- 50% for PSA)</p> <p><b>Since this study is based in Ontario and the drug costs paid by the Ontario Drug Benefits program are fixed, the prices are fixed. It would be more helpful to run the model with specific costs for each province to account for the uncertainty in the model for fixed costs. We can do this if other provinces request the data.</b></p> <p>Minor concerns:</p> <p>Abstract -- When stating that apixaban was economically favourable in 97% of microsimulations, the authors should specify the pay threshold used to benchmark cost-effectiveness (i.e., 50,000).</p> <p><b>This has been added to the abstract.</b></p> <p><b>“There was moderate uncertainty in the ranking with apixaban as preferred choice in 66% of model simulations with a maximum to-pay of C\$50,000/QALY...” (Abstract document)</b></p> |

|                                            |                                                                                                                                                                                                                                                                                                                                                                                                                                                                                                                                                                                                                                                                                                                                                                                                                                                                                                                                                                                                                                                                                                                                                                                                                                                                                                                                                                                                                                                                                                                                                                                                                                                                                                                                                                                                                                                                                                                                                                                                                                                                                                                                                                                                                                                                                                                                                                                                                                                                                                                                                                                                                                                                                                                                                                                                                                                                                                                                                          |
|--------------------------------------------|----------------------------------------------------------------------------------------------------------------------------------------------------------------------------------------------------------------------------------------------------------------------------------------------------------------------------------------------------------------------------------------------------------------------------------------------------------------------------------------------------------------------------------------------------------------------------------------------------------------------------------------------------------------------------------------------------------------------------------------------------------------------------------------------------------------------------------------------------------------------------------------------------------------------------------------------------------------------------------------------------------------------------------------------------------------------------------------------------------------------------------------------------------------------------------------------------------------------------------------------------------------------------------------------------------------------------------------------------------------------------------------------------------------------------------------------------------------------------------------------------------------------------------------------------------------------------------------------------------------------------------------------------------------------------------------------------------------------------------------------------------------------------------------------------------------------------------------------------------------------------------------------------------------------------------------------------------------------------------------------------------------------------------------------------------------------------------------------------------------------------------------------------------------------------------------------------------------------------------------------------------------------------------------------------------------------------------------------------------------------------------------------------------------------------------------------------------------------------------------------------------------------------------------------------------------------------------------------------------------------------------------------------------------------------------------------------------------------------------------------------------------------------------------------------------------------------------------------------------------------------------------------------------------------------------------------------------|
|                                            | <p>Extendedly dominated – While these terms are common place for the health economic literature, would su allow the manuscript to be more readily digested by the clinical audience.<br/> <b>We explain this in the Supplementary Appendix 1 in the Outcomes section. We also added a line to 133).</b></p> <p><b>“When listed by increasing life-time cost, edoxaban, rivaroxaban and dabigatran were absolutely d dominated by extension by ASA and apixaban (Figure 1). Extended dominance means that the effe achieved with less cost by a combination of ASA and apixaban.”</b></p> <p>“ASA was the dominant strategy if the WTP threshold was below C\$8,621” – would remove this sentence, of the manuscript.<br/> <b>This sentence was removed.</b></p>                                                                                                                                                                                                                                                                                                                                                                                                                                                                                                                                                                                                                                                                                                                                                                                                                                                                                                                                                                                                                                                                                                                                                                                                                                                                                                                                                                                                                                                                                                                                                                                                                                                                                                                                                                                                                                                                                                                                                                                                                                                                                                                                                                                          |
| <b>Reviewer 2</b>                          | Douglas Coyle                                                                                                                                                                                                                                                                                                                                                                                                                                                                                                                                                                                                                                                                                                                                                                                                                                                                                                                                                                                                                                                                                                                                                                                                                                                                                                                                                                                                                                                                                                                                                                                                                                                                                                                                                                                                                                                                                                                                                                                                                                                                                                                                                                                                                                                                                                                                                                                                                                                                                                                                                                                                                                                                                                                                                                                                                                                                                                                                            |
| Institution                                | Department of Epidemiology and Community Medicine, University of Ottawa, Ottawa, Ont.                                                                                                                                                                                                                                                                                                                                                                                                                                                                                                                                                                                                                                                                                                                                                                                                                                                                                                                                                                                                                                                                                                                                                                                                                                                                                                                                                                                                                                                                                                                                                                                                                                                                                                                                                                                                                                                                                                                                                                                                                                                                                                                                                                                                                                                                                                                                                                                                                                                                                                                                                                                                                                                                                                                                                                                                                                                                    |
| General comments (author response in bold) | <p>When referencing the previous work relating to the cost effectiveness of DOACs it would be more relevant Canadian study that was funded through DSEN and CADTH than a non-Canadian study.<br/> <b>We substituted this citation in the introduction (page 1, lines 15-16).</b></p> <p><b>“The DOACs are economically attractive compared to warfarin in the general Canadian population an older population with falls is uncertain.”</b></p> <p>Under methods, the authors should begin with a concise description of the decision problem which their st<br/> <b>Due to space limitations, we have not repeated the decision problem in the methods. A concise de introduction.</b></p> <p>I’m unconvinced about why the authors adopted a microsimulation approach to this study. It seems unnee more informative design would be to have divided the population into patient strata and conducted a stratif Strata could relate to the combination age, sex, HAS-BLED and CHADS scores. This would allow decision strata different treatments are optimal.<br/> <b>Two-dimensional microsimulations allow simulating individual patient characteristics similar to a r understanding the uncertainties around the overall best decision for a population, which is what a to know. Doing a stratified analysis is less efficient because multiple models would have to be run listed characteristics (age, sex, HAS-BLED, etc). We added deterministic sensitivity analysis to add conclusions with some of the characteristics listed here (age, bleeding risk, and falls risk).</b></p> <p>Please change the term “within-cycle” to “half-cycle”.<br/> <b>We changed the cited reference to highlight why “within-cycle” correction is more appropriate (pag preferred term in the current literature, which has changed since the ISPOR 2012 guidelines.</b><br/> <b>“Within-cycle correction was used to compensate for biases occurring with discrete-time rather th transitions [15].”</b></p> <p>The explanation for the analysis under the Outcomes section is unclear. Were outcomes obtained from th by recent guidelines?<br/> Table 4 should be revised to present a sequential analysis – please follow the CADTH guidelines for this.<br/> <b>Yes, the outcomes were from a probabilistic analysis (two-dimensional microsimulation). Table 4 is follows CADTH guidelines (page 56 of CADTH guidelines:</b><br/> <b><a href="https://www.cadth.ca/sites/default/files/pdf/guidelines_for_the_economic_evaluation_of_health_te">https://www.cadth.ca/sites/default/files/pdf/guidelines_for_the_economic_evaluation_of_health_te</a></b><br/> <b>We added additional outcomes explanation in supplementary appendix 1.</b></p> <p>Under health states reference is made to a decision tree – is this correct? Earlier the model is described a more appropriate. Please also combine Figures 1 and 2 to represent a Markov model.</p> |

|                                            |                                                                                                                                                                                                                                                                                                                                                                                                                                                                                                                                                                                                                                                                                                                                                                                                                                                                                                                                                                                                                                                                                                                                                                                                                                                                                                                                                                                                                                                                                                                                                                                                                                                                                                                                                                                                                                                                                                                                                                                                                                                                                                                                                                                                                                                                                                                                                                                                                                                                                                                                                                                                                                                                                                                                                                                                                                                                                                                                                                                                                                                                                                                                                                                                                                                                                                                                                                                                                                                                                                                                                                                                                                                                                                                                              |
|--------------------------------------------|----------------------------------------------------------------------------------------------------------------------------------------------------------------------------------------------------------------------------------------------------------------------------------------------------------------------------------------------------------------------------------------------------------------------------------------------------------------------------------------------------------------------------------------------------------------------------------------------------------------------------------------------------------------------------------------------------------------------------------------------------------------------------------------------------------------------------------------------------------------------------------------------------------------------------------------------------------------------------------------------------------------------------------------------------------------------------------------------------------------------------------------------------------------------------------------------------------------------------------------------------------------------------------------------------------------------------------------------------------------------------------------------------------------------------------------------------------------------------------------------------------------------------------------------------------------------------------------------------------------------------------------------------------------------------------------------------------------------------------------------------------------------------------------------------------------------------------------------------------------------------------------------------------------------------------------------------------------------------------------------------------------------------------------------------------------------------------------------------------------------------------------------------------------------------------------------------------------------------------------------------------------------------------------------------------------------------------------------------------------------------------------------------------------------------------------------------------------------------------------------------------------------------------------------------------------------------------------------------------------------------------------------------------------------------------------------------------------------------------------------------------------------------------------------------------------------------------------------------------------------------------------------------------------------------------------------------------------------------------------------------------------------------------------------------------------------------------------------------------------------------------------------------------------------------------------------------------------------------------------------------------------------------------------------------------------------------------------------------------------------------------------------------------------------------------------------------------------------------------------------------------------------------------------------------------------------------------------------------------------------------------------------------------------------------------------------------------------------------------------------|
|                                            | <p><b>The Markov model has health states where individuals encounter events. These events are indicated in the cycle diagram (supplementary figure SF2) shows the health states through. It's unclear whether the reviewer wants the two figures to be juxtaposed or if there's another figure. Please note that Figures 1 and 2 were put into the supplementary material to reduce number of figures.</b></p> <p>There is much confusion over how the authors have incorporated variability which relates to heterogeneity which relates to the unknown true expected value. The authors sometimes seem to be confused with these two concepts. The current model framework both variability (within the inner loop) and uncertainty (within the outer loop) need separate parameters. Currently, I feel they are greatly underestimating the uncertainty with their findings.</p> <p><b>We elaborated more on uncertainty in the supplementary appendix. To our knowledge, it is not common to have a parameter in both inner and outer loops. Our approach follows CADTH guidelines.</b></p> <p><b>“On an outer, second-order loop, parameter-level uncertainty was examined by selecting key model parameters representing the fact that estimates of parameter values derived from studies entail uncertainty. For example, a set of inner loop iterations were run, each representing a hypothetical patient, whose characteristics (e.g. fall risk (using CHADS score), bleeding risk (using HAS-BLED score), and falls risk—were sampled from a distribution. Sampling individual patient characteristics allows for both a representation of individual variability and transition among various health states to depend on a given patient’s attributes. We ran each hypothetical patient through the anticoagulation strategies in turn.” (Supplementary appendix 1).</b></p> <p>For figure 3, please remove the term “average” from “average cost effectiveness plane”.</p> <p><b>We prefer including the term “average” because the plot indicates average cost-effectiveness values. To reduce the number of figures and tables, we moved the first two figures to supplementary appendix 1.</b></p> <p>For figure 4, please change y-axis to “probability treatment is optimal”.</p> <p><b>This has been relabelled Figure 2. We kept “% iterations cost-effective” on the y-axis title because it represents the model iterations where the intervention is cost-effective. This can be interpreted as probability of treatment being optimal.</b></p> <p>For table 2, please provide the actual parameters used to populate the distributions – not a range which is insufficient data in Table 2 to determine the degree of variability and uncertainty in each data element.</p> <p><b>This was included in the supplementary appendix in the original submission. See supplementary appendix 1.</b></p> <p>For table 4, it is unclear what the 95% confidence intervals relate to. Are they credible intervals which would be actual confidence intervals which are irrelevant as they are merely a function of the number of iterations. Are they the ICERs from each iteration or the difference in mean costs divided by the difference in mean QALYs? I think they are the latter.</p> <p><b>Yes, they should be called credible intervals. We have changed this in the revision for table 4.</b></p> <p>For table 5, the same concern: it is unclear what the 95% confidence intervals relate to. Are they credible intervals or are they actual confidence intervals which are irrelevant as they are merely a function of the number of iterations?</p> <p><b>Yes, we relabelled them credible intervals.</b></p> |
| <b>Reviewer 3</b>                          | Michael Hill, Dr. Hill, michael.hill@ucalgary.ca                                                                                                                                                                                                                                                                                                                                                                                                                                                                                                                                                                                                                                                                                                                                                                                                                                                                                                                                                                                                                                                                                                                                                                                                                                                                                                                                                                                                                                                                                                                                                                                                                                                                                                                                                                                                                                                                                                                                                                                                                                                                                                                                                                                                                                                                                                                                                                                                                                                                                                                                                                                                                                                                                                                                                                                                                                                                                                                                                                                                                                                                                                                                                                                                                                                                                                                                                                                                                                                                                                                                                                                                                                                                                             |
| Institution                                | Department of Clinical Neurosciences, University of Calgary, Calgary, Alta.                                                                                                                                                                                                                                                                                                                                                                                                                                                                                                                                                                                                                                                                                                                                                                                                                                                                                                                                                                                                                                                                                                                                                                                                                                                                                                                                                                                                                                                                                                                                                                                                                                                                                                                                                                                                                                                                                                                                                                                                                                                                                                                                                                                                                                                                                                                                                                                                                                                                                                                                                                                                                                                                                                                                                                                                                                                                                                                                                                                                                                                                                                                                                                                                                                                                                                                                                                                                                                                                                                                                                                                                                                                                  |
| General comments (author response in bold) | <p>1. This is a modelling study to attempt the differential utility of antithrombotic therapy strategies for patient with atrial fibrillation. This is a relevant clinical question that will not be likely to be studied with RCTs. Therefore, the modelling approach is appropriate.</p> <p>2. Like all modelling studies, the outcome depends on the assumptions used, and how closely these mimic actual clinical practice. Assumptions:</p> <p>A) In Canada reduced dosing regimens are available (eg. Apixaban 2.5mg bid, dabigatran 110 mg bid, rivaroxaban 15mg bid), particularly for elderly patients. These all have reduced efficacy, quantitatively, even if they cost the same as the full dose. This is disproportionately to the population at risk of falling, who will typically be elderly. Please present data more clearly.</p>                                                                                                                                                                                                                                                                                                                                                                                                                                                                                                                                                                                                                                                                                                                                                                                                                                                                                                                                                                                                                                                                                                                                                                                                                                                                                                                                                                                                                                                                                                                                                                                                                                                                                                                                                                                                                                                                                                                                                                                                                                                                                                                                                                                                                                                                                                                                                                                                                                                                                                                                                                                                                                                                                                                                                                                                                                                                                         |



|  |                                                                                                                                              |
|--|----------------------------------------------------------------------------------------------------------------------------------------------|
|  | <p><b>“The findings from this study can guide policies to encourage the use of economically attractive m<br/>(page 9, lines 201-202)</b></p> |
|--|----------------------------------------------------------------------------------------------------------------------------------------------|
